# Supplementary material
Source: publisher figshare collection journal article supplement (https://karger.figshare.com/ndownloader/files/15679358)
Supplement: Supplementary file 1 [file 15679358]

Appendix Table A1: Internal consistency coefficients (Cronbach’s alpha) for the items, subscales and the total scale of the German PFS version (N=2421)

|  | *Cronbach’s α a* | | | |
| --- | --- | --- | --- | --- |
| *Items* | *available* | *present* | *tasted* | *Total scale* |
| Q1 | 0.83 |  |  | 0.91 |
| Q2 | 0.83 |  |  | 0.91 |
| Q3 |  | 0.84 |  | 0.91 |
| Q4 |  | 0.81 |  | 0.91 |
| Q5 | 0.83 |  |  | 0.91 |
| Q6 |  | 0.80 |  | 0.91 |
| Q7 |  | 0.81 |  | 0.91 |
| Q8 |  |  | 0.74 | 0.91 |
| Q9 |  |  | 0.74 | 0.91 |
| Q10 | 0.82 |  |  | 0.91 |
| Q11 | 0.84 |  |  | 0.91 |
| Q12 |  |  | 0.77 | 0.91 |
| Q13 | 0.80 |  |  | 0.91 |
| Q14 |  |  | 0.78 | 0.92 |
| Q15 |  |  | 0.79 | 0.92 |
| *Total* | *0.85* | *0.85* | *0.80* | *0.92* |

a analyses were conducted for cases with complete PFS data; available, subscale “food available”; present, subscale “food present”; tasted, subscale “food tasted”; Q1-Q15, item numbering in the German PFS version.

Appendix Table A2: Cohen’s d effect size for comparing the differences between the PFS-score means across BMI categories (N=2421)

|  | *Cohen`s d a* | | |
| --- | --- | --- | --- |
|  | *overweight versus underweight/normal weight* | *obesity versus overweight* | *obesity versus underweight/normal weight* |
| food available | 0.22 | 0.41 | 0.68 |
| food present | 0.24 | 0.39 | 0.67 |
| food tasted | 0.14 | 0.19 | 0.34 |
| total mean score | 0.23 | 0.37 | 0.63 |

a The effect size (Cohen’s d) was calculated as the difference of the means of two groups divided by the weighted pooled standard deviations of these groups d=(1-2)/s. According to Cohen, the effect size measures of <0.2 are very small, 0.2-0.4 are small, 0.5-0.7 are medium and ≥8 are large.

**Appendix Table A3: Gender-specific norm values fort the German version of the Power of Food Scale (N =2421)**

| *Females (N = 1290)* | | | | | *Males (N=1131)* | | | | |
| --- | --- | --- | --- | --- | --- | --- | --- | --- | --- |
| Percentile Rank | Food available | Food present | Food tasted | Total mean score | Percentile Rank | Food available | Food present | Food tasted | Total mean score |
| *5* | 1.00 | 1.00 | 1.00 | 1.00 | *5* | 1.00 | 1.00 | 1.00 | 1.00 |
| *10* | 1.00 | 1.00 | 1.20 | 1.20 | *10* | 1.00 | 1.00 | 1.20 | 1.13 |
| *15* | 1.00 | 1.00 | 1.40 | 1.27 | *15* | 1.00 | 1.00 | 1.40 | 1.27 |
| *20* | 1.00 | 1.25 | 1.60 | 1.40 | *20* | 1.00 | 1.25 | 1.60 | 1.33 |
| *25* | 1.17 | 1.50 | 1.80 | 1.47 | *25* | 1.17 | 1.25 | 1.80 | 1.47 |
| *30* | 1.17 | 1.50 | 2.00 | 1.60 | *30* | 1.17 | 1.50 | 1.80 | 1.53 |
| *35* | 1.33 | 1.50 | 2.00 | 1.67 | *35* | 1.17 | 1.50 | 2.00 | 1.67 |
| *40* | 1.33 | 1.75 | 2.20 | 1.80 | *40* | 1.33 | 1.75 | 2.20 | 1.73 |
| *45* | 1.33 | 1.75 | 2.40 | 1.87 | *45* | 1.33 | 1.75 | 2.40 | 1.87 |
| *50* | 1.50 | 2.00 | 2.40 | 1.93 | *50* | 1.50 | 2.00 | 2.40 | 1.93 |
| *55* | 1.50 | 2.00 | 2.60 | 2.07 | *55* | 1.67 | 2.00 | 2.60 | 2.07 |
| *60* | 1.67 | 2.25 | 2.80 | 2.20 | *60* | 1.70 | 2.25 | 2.60 | 2.20 |
| *65* | 1.83 | 2.25 | 2.80 | 2.33 | *65* | 1.83 | 2.50 | 2.80 | 2.33 |
| *70* | 2.00 | 2.50 | 3.00 | 2.47 | *70* | 2.00 | 2.50 | 3.00 | 2.47 |
| *75* | 2.17 | 2.75 | 3.20 | 2.60 | *75* | 2.17 | 2.75 | 3.00 | 2.60 |
| *80* | 2.33 | 3.00 | 3.20 | 2.73 | *80* | 2.33 | 3.00 | 3.20 | 2.73 |
| *85* | 2.50 | 3.25 | 3.40 | 2.87 | *85* | 2.50 | 3.25 | 3.40 | 2.87 |
| *90* | 2.83 | 3.50 | 3.60 | 3.07 | *90* | 2.83 | 3.50 | 3.60 | 3.07 |
| *95* | 3.33 | 4.00 | 3.80 | 3.40 | *95* | 3.16 | 3.75 | 4.00 | 3.47 |
| *99* | 4.00 | 4.50 | 4.40 | 4.00 | *99* | 4.11 | 4.50 | 4.40 | 4.11 |

Notes: N, number of participants with complete responses

**Table A4: Age-specific norm values fort the German version of the Power of Food Scale (N = 2421)**

| *14-34 years (N =652)* | | | | | *35-54 years (N =824)* | | | | | *≥ 55 years (N =945)* | | | | |
| --- | --- | --- | --- | --- | --- | --- | --- | --- | --- | --- | --- | --- | --- | --- |
| Perc. | FA | FP | FT | TS | Perc. | FA | FP | FT | TS | Perc. | FA | FP | FT | TS |
| *5* | 1.00 | 1.00 | 1.00 | 1.00 | *5* | 1.00 | 1.00 | 1.00 | 1.00 | *5* | 1.00 | 1.00 | 1.00 | 1.00 |
| *10* | 1.00 | 1.00 | 1.20 | 1.15 | *10* | 1.00 | 1.00 | 1.20 | 1.13 | *10* | 1.00 | 1.00 | 1.20 | 1.13 |
| *15* | 1.00 | 1.00 | 1.40 | 1.27 | *15* | 1.00 | 1.25 | 1.40 | 1.33 | *15* | 1.00 | 1.00 | 1.40 | 1.27 |
| *20* | 1.00 | 1.25 | 1.60 | 1.40 | *20* | 1.00 | 1.25 | 1.60 | 1.40 | *20* | 1.00 | 1.25 | 1.60 | 1.33 |
| *25* | 1.17 | 1.50 | 1.80 | 1.53 | *25* | 1.17 | 1.50 | 1.80 | 1.53 | *25* | 1.17 | 1.25 | 1.60 | 1.40 |
| *30* | 1.17 | 1.50 | 2.00 | 1.60 | *30* | 1.17 | 1.50 | 2.00 | 1.67 | *30* | 1.17 | 1.50 | 1.80 | 1.53 |
| *35* | 1.33 | 1.75 | 2.00 | 1.67 | *35* | 1.33 | 1.75 | 2.00 | 1.73 | *35* | 1.17 | 1.50 | 2.00 | 1.60 |
| *40* | 1.33 | 1.75 | 2.20 | 1.80 | *40* | 1.33 | 1.75 | 2.20 | 1.80 | *40* | 1.33 | 1.50 | 2.00 | 1.67 |
| *45* | 1.50 | 2.00 | 2.40 | 1.93 | *45* | 1.50 | 1.75 | 2.40 | 1.87 | *45* | 1.33 | 1.75 | 2.20 | 1.73 |
| *50* | 1.50 | 2.00 | 2.50 | 2.00 | *50* | 1.50 | 2.00 | 2.40 | 2.00 | *50* | 1.50 | 1.75 | 2.40 | 1.87 |
| *55* | 1.67 | 2.25 | 2.60 | 2.13 | *55* | 1.67 | 2.00 | 2.60 | 2.13 | *55* | 1.50 | 2.00 | 2.40 | 1.93 |
| *60* | 1.83 | 2.50 | 2.80 | 2.27 | *60* | 1.83 | 2.25 | 2.80 | 2.27 | *60* | 1.67 | 2.00 | 2.60 | 2.07 |
| *65* | 2.00 | 2.50 | 3.00 | 2.43 | *65* | 1.83 | 2.50 | 2.80 | 2.33 | *65* | 1.82 | 2.25 | 2.80 | 2.20 |
| *70* | 2.00 | 2.75 | 3.00 | 2.53 | *70* | 2.00 | 2.75 | 3.00 | 2.47 | *70* | 1.87 | 2.25 | 2.80 | 2.33 |
| *75* | 2.17 | 2.75 | 3.20 | 2.73 | *75* | 2.17 | 2.75 | 3.20 | 2.60 | *75* | 2.08 | 2.50 | 3.00 | 2.47 |
| *80* | 2.33 | 3.00 | 3.40 | 2.80 | *80* | 2.33 | 3.00 | 3.20 | 2.80 | *80* | 2.33 | 2.75 | 3.20 | 2.60 |
| *85* | 2.50 | 3.25 | 3.60 | 2.93 | *85* | 2.67 | 3.25 | 3.40 | 2.93 | *85* | 2.50 | 3.00 | 3.20 | 2.80 |
| *90* | 2.83 | 3.50 | 3.60 | 3.13 | *90* | 3.00 | 3.50 | 3.60 | 3.13 | *90* | 2.67 | 3.25 | 3.40 | 3.00 |
| *95* | 3.17 | 4.00 | 4.00 | 3.40 | *95* | 3.33 | 4.00 | 4.00 | 3.53 | *95* | 3.17 | 3.75 | 3.80 | 3.27 |
| *99* | 4.17 | 4.50 | 4.49 | 4.16 | *99* | 4.00 | 4.69 | 4.40 | 4.17 | *99* | 3.92 | 4.38 | 4.40 | 3.93 |

Notes: N, number of participants with complete responses; Perc., percentile; FA, food available; FP, food present; FT, food tasted; TS, total score

**Table A5: BMI-specific norm values fort the German version of the Power of Food Scale (N =2382)**

| *Normal- & underweight (N=1180)* | | | | | *Overweight (N=871)* | | | | | *Obesity (N=331)* | | | | |
| --- | --- | --- | --- | --- | --- | --- | --- | --- | --- | --- | --- | --- | --- | --- |
| Percentile Rank | FA | FP | FT | TS | Percentile Rank | FA | FP | FT | TS | Percentile Rank | FA | FP | FT | TS |
| *5* | 1.00 | 1.00 | 1.00 | 1.00 | *5* | 1.00 | 1.00 | 1.00 | 1.00 | *5* | 1.00 | 1.00 | 1.20 | 1.20 |
| *10* | 1.00 | 1.00 | 1.00 | 1.07 | *10* | 1.00 | 1.00 | 1.20 | 1.20 | *10* | 1.17 | 1.25 | 1.40 | 1.33 |
| *15* | 1.00 | 1.00 | 1.20 | 1.20 | *15* | 1.00 | 1.00 | 1.40 | 1.27 | *15* | 1.17 | 1.50 | 1.60 | 1.47 |
| *20* | 1.00 | 1.25 | 1.40 | 1.33 | *20* | 1.00 | 1.25 | 1.60 | 1.40 | *20* | 1.33 | 1.50 | 1.80 | 1.60 |
| *25* | 1.00 | 1.25 | 1.60 | 1.40 | *25* | 1.17 | 1.25 | 1.80 | 1.53 | *25* | 1.33 | 1.75 | 2.00 | 1.73 |
| *30* | 1.17 | 1.50 | 1.80 | 1.49 | *30* | 1.17 | 1.50 | 1.92 | 1.60 | *30* | 1.50 | 1.75 | 2.20 | 1.87 |
| *35* | 1.17 | 1.50 | 2.00 | 1.60 | *35* | 1.33 | 1.50 | 2.00 | 1.67 | *35* | 1.50 | 2.00 | 2.40 | 1.93 |
| *40* | 1.33 | 1.50 | 2.20 | 1.67 | *40* | 1.33 | 1.75 | 2.20 | 1.79 | *40* | 1.67 | 2.00 | 2.40 | 2.07 |
| *45* | 1.33 | 1.75 | 2.20 | 1.80 | *45* | 1.33 | 2.00 | 2.40 | 1.87 | *45* | 1.83 | 2.25 | 2.60 | 2.22 |
| *50* | 1.33 | 1.75 | 2.40 | 1.87 | *50* | 1.50 | 2.00 | 2.40 | 2.00 | *50* | 2.00 | 2.50 | 2.60 | 2.33 |
| *55* | 1.50 | 1.75 | 2.40 | 1.93 | *55* | 1.67 | 2.25 | 2.60 | 2.13 | *55* | 2.17 | 2.75 | 2.80 | 2.47 |
| *60* | 1.50 | 2.00 | 2.60 | 2.07 | *60* | 1.83 | 2.25 | 2.64 | 2.27 | *60* | 2.17 | 2.80 | 3.00 | 2.60 |
| *65* | 1.67 | 2.00 | 2.80 | 2.13 | *65* | 1.83 | 2.50 | 2.80 | 2.33 | *65* | 2.33 | 3.00 | 3.00 | 2.73 |
| *70* | 1.83 | 2.25 | 2.80 | 2.27 | *70* | 2.00 | 2.75 | 3.00 | 2.47 | *70* | 2.50 | 3.25 | 3.20 | 2.80 |
| *75* | 2.00 | 2.50 | 3.00 | 2.40 | *75* | 2.16 | 2.75 | 3.20 | 2.67 | *75* | 2.67 | 3.25 | 3.20 | 2.93 |
| *80* | 2.16 | 2.75 | 3.20 | 2.53 | *80* | 2.50 | 3.00 | 3.20 | 2.80 | *80* | 2.83 | 3.50 | 3.40 | 3.07 |
| *85* | 2.33 | 2.75 | 3.40 | 2.73 | *85* | 2.67 | 3.25 | 3.40 | 2.93 | *85* | 3.00 | 3.50 | 3.40 | 3.21 |
| *90* | 2.50 | 3.25 | 3.60 | 2.87 | *90* | 3.00 | 3.50 | 3.60 | 3.20 | *90* | 3.33 | 4.00 | 3.60 | 3.59 |
| *95* | 2.83 | 3.50 | 3.80 | 3.13 | *95* | 3.33 | 4.00 | 4.00 | 3.53 | *95* | 3.83 | 4.25 | 4.00 | 3.93 |
| *99* | 3.67 | 4.25 | 4.20 | 3.75 | *99* | 4.00 | 4.50 | 4.60 | 4.08 | *99* | 4.39 | 4.75 | 4.80 | 4.58 |

Notes: N, number of participants with complete responses; FA, food available; FP, food present; FT, food tasted; TS, total score
